# Supplementary material
Source: PubMed Central journal article supplement (PMC9338319)
Supplement: 41598_2022_16532_MOESM1_ESM.pdf [file 41598_2022_16532_MOESM1_ESM.pdf]

Supplementary Material - Ranking the  
Effectiveness of Non-Pharmaceutical  
Interventions to Counter COVID-19 in UK  
Universities with Vaccinated Population

Zirui Niu<sup>1</sup> and Giordano Scarciotti<sup>1\*</sup>

<sup>1</sup>EEE, Imperial College London, Exhibition Rd, South  
Kensington, London, SW7 2AZ, United Kingdom.

\*Corresponding author(s). E-mail(s): [g.scarciotti@imperial.ac.uk](mailto:g.scarciotti@imperial.ac.uk);  
Contributing authors: [z.niu@outlook.com](mailto:z.niu@outlook.com);

## Appendix A Sensitivity Figures

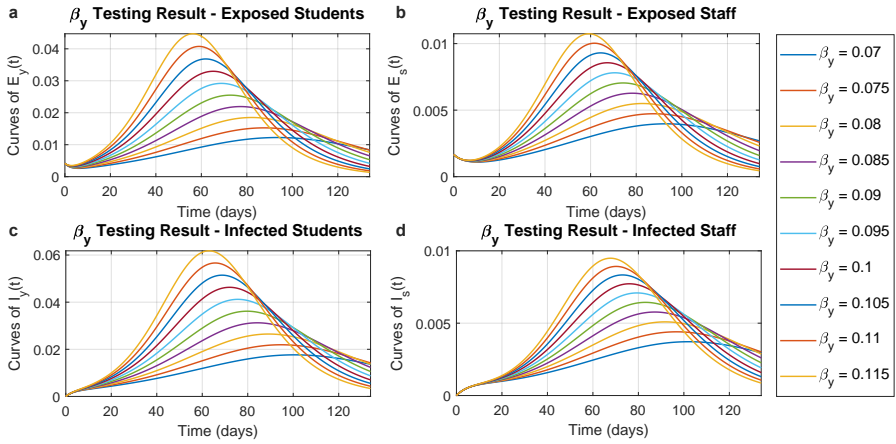

**Fig. A1** Numerical testing of student-to-student infection rate  $\beta_y$ . Trajectories of cases among students and staffs when  $\beta_y$  varying from 0.07 to 0.115. With different  $\beta_y$ , panels a and b show the proportion trajectories of exposed students and staffs respectively while panels c and d depict the proportion trajectories of infected students and staffs respectively.

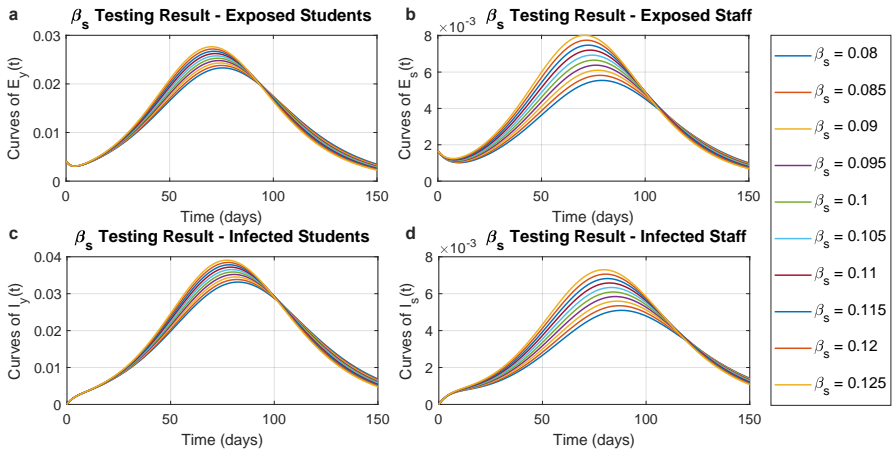

**Fig. A2** Numerical testing of student-to-student infection rate  $\beta_s$ . Trajectories of cases among students and staffs when  $\beta_s$  varying from 0.08 to 0.125. With different  $\beta_s$ , panels a and b show the proportion trajectories of exposed students and staffs respectively while panels c and d depict the proportion trajectories of infected students and staffs respectively.

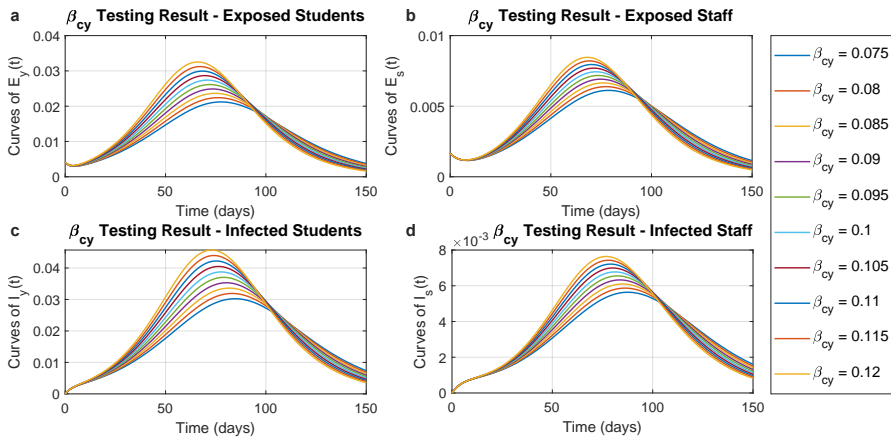

**Fig. A3 Numerical testing of student-to-student infection rate  $\beta_{cy}$ .** Trajectories of cases among students and staff when  $\beta_{cy}$  varying from 0.075 to 0.12. With different  $\beta_{cy}$ , panels **a** and **b** show the proportion trajectories of exposed students and staffs respectively while panels **c** and **d** depict the proportion trajectories of infected students and staffs respectively.

4 *Ranking the Effectiveness of Non-Pharmaceutical Interventions*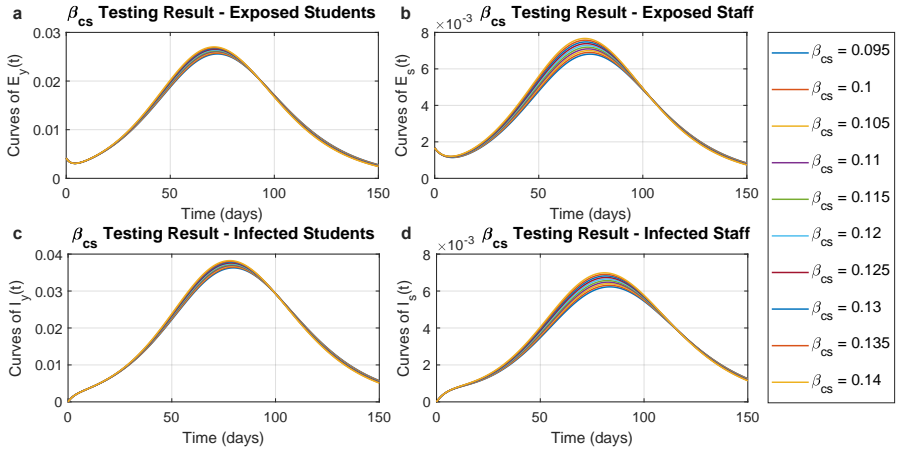

**Fig. A4** Numerical testing of student-to-student infection rate  $\beta_{cs}$ . Trajectories of cases among students and staffs when  $\beta_{cs}$  varying from 0.095 to 0.14. With different  $\beta_{cs}$ , panels a and b show the proportion trajectories of exposed students and staffs respectively while panels c and d depict the proportion trajectories of infected students and staffs respectively.

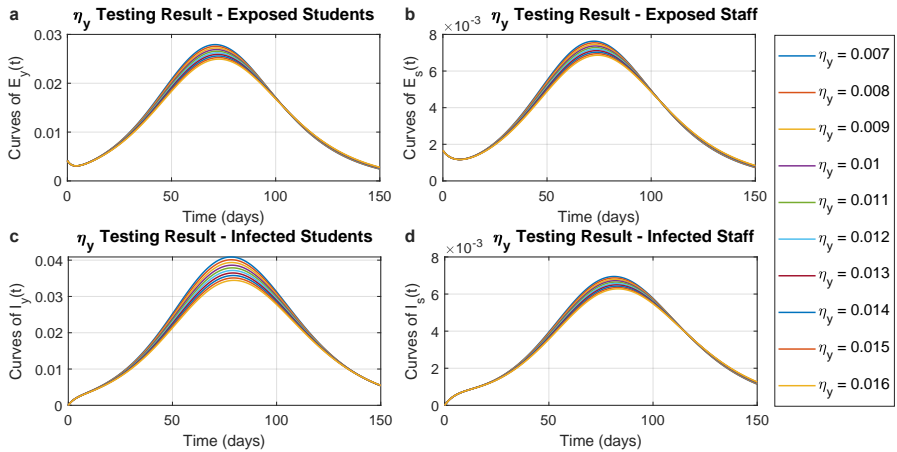

**Fig. A5** Numerical testing of student-to-student infection rate  $\eta_y$ . Trajectories of cases among students and staffs when  $\eta_y$  varying from 0.007 to 0.016. With different  $\eta_y$ , panels a and b show the proportion trajectories of exposed students and staffs respectively while panels c and d depict the proportion trajectories of infected students and staffs respectively.

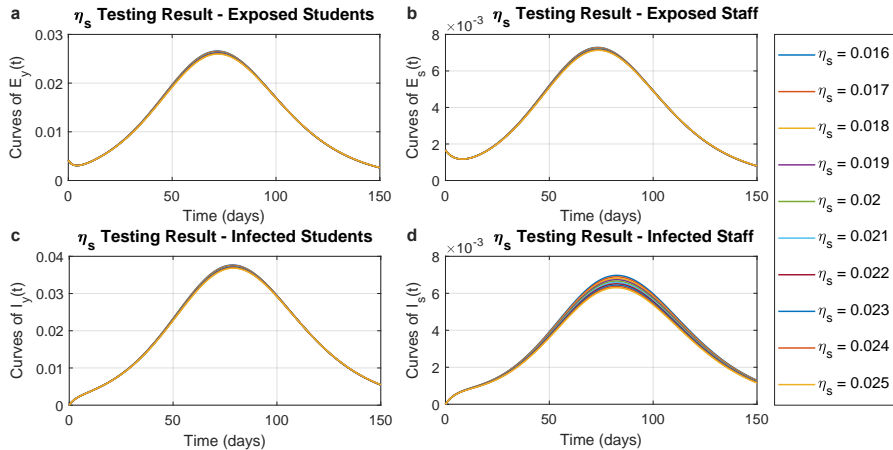

**Fig. A6 Numerical testing of student-to-student infection rate  $\eta_s$ .** Trajectories of cases among students and staffs when  $\eta_s$  varying from 0.016 to 0.025. With different  $\eta_s$ , panels a and b show the proportion trajectories of exposed students and staffs respectively while panels c and d depict the proportion trajectories of infected students and staffs respectively.

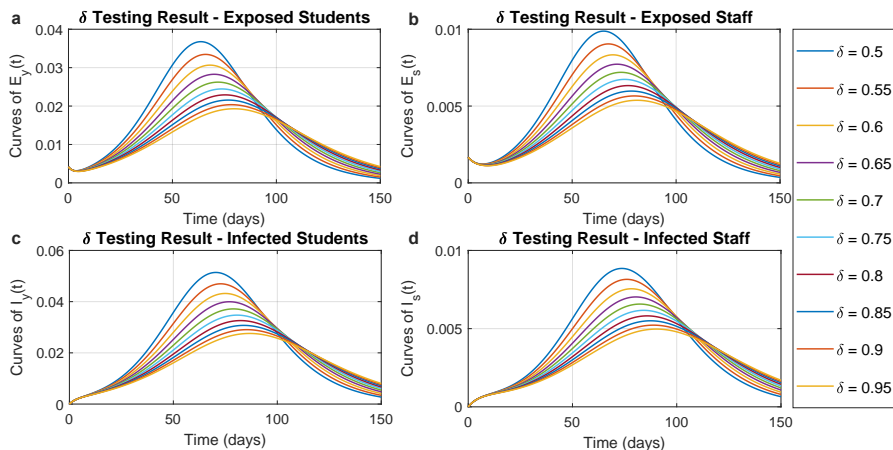

**Fig. A7 Numerical testing of student-to-student infection rate  $\delta$ .** Trajectories of cases among students and staffs when  $\delta$  varying from 0.5 to 0.95. With different  $\delta$ , panels a and b show the proportion trajectories of exposed students and staffs respectively while panels c and d depict the proportion trajectories of infected students and staffs respectively.

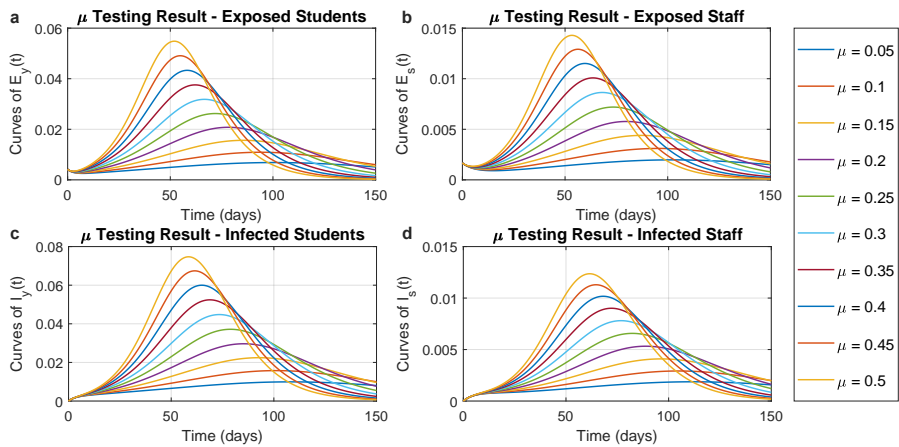

**Fig. A8** Numerical testing of student-to-student infection rate  $\mu$ . Trajectories of cases among students and staffs when  $\mu$  varying from 0.05 to 0.5. With different  $\mu$ , panels a and b show the proportion trajectories of exposed students and staffs respectively while panels c and d depict the proportion trajectories of infected students and staffs respectively.
